# Supplementary material
Source: PubMed Central journal article supplement (PMC3416617)

1 **FIG. S1.** (A) Isolated lytic plaques of *B. bacteriovorus* HD100 growing on *P. putida* as  
2 prey. (B) Alignment of the amino acid sequences of the extracellular mcl-PHA  
3 depolymerases from *B. bacteriovorus* HD100 (PhaZ<sub>Bd</sub>) and *P. fluorescens* GK13  
4 (PhaZ<sub>GK13</sub>). Predicted processing site (between amino acids 20 to 21 of PhaZ<sub>Bd</sub>  
5 preprotein) is marked by vertical arrow. The lipase consensus sequence is boxed.

6

7 **FIG. S2.** Production of PhaZ<sub>Bd</sub> in *E. coli*. (A) SDS-PAGE analysis of the soluble crude  
8 extract fraction of *E. coli* strains grown in LB medium: lane 1, DH10B (pIZ1016); lane  
9 2, DH10B (pIZBd1). (B) SDS-PAGE analysis of the concentrated culture supernatants  
10 of *E. coli* strains grown in minimal medium: lane 1, DH10B (pIZ1016); lane 2, DH10B  
11 (pIZBd1); lane 3, K1041 (pIZ1016); lane 4, K1041 (pIZBd1). Black arrow in panels (A)  
12 and (B) shows the position of PhaZ<sub>Bd</sub>.

13

14 **FIG. S3.** Semi-purification of native PhaZ<sub>Bd</sub> produced by *P. putida* AΩ (pIZBd1). (A)  
15 SDS-PAGE analysis of *P. putida* AΩ: line 1, AΩ (pIZ1016) culture supernatant; lane 2,  
16 AΩ (pIZBd1) culture supernatant; lane 3, standard markers; lane 4, semi-purified  
17 PhaZ<sub>Bd</sub> (22 μg/ml) (B) Enzyme activity measured in mcl-PHA agar plates of 20 μl of  
18 the recovered fractions obtained after octyl-sepharose purification. (C) Assay of semi-  
19 purified PhaZ<sub>Bd</sub> activity in native polyacrylamide gels layered onto mcl-PHA agar  
20 plates: lane 1, 0.5 μg of semi-purified PhaZ<sub>Bd</sub>; lane 2, 0.1 μg of semi-purified PhaZ<sub>Bd</sub>.  
21 Depolymerase activity was detected after 2 h of incubation at 37°C. Black arrows in  
22 panels (A) and (C) shows the position of the PhaZ<sub>Bd</sub>.

23

24 **FIG. S4.** Identification by HPLC-MS of the mcl-PHA hydrolysis products catalyzed by  
25 the *B. bacteriovorus* HD100 depolymerase at 1 h of enzymatic hydrolysis. (A) HPLC

26 analysis of reaction products. (B) MS analysis of peaks depicted in the HPLC  
27 chromatogram. The analysis revealed the existence of five chromatographic peaks (A)  
28 with retention times of 11.0 min (*peak 1*), 15.7 min (*peak 2*), 16.6 min (*peak 3*), 17.3  
29 min (*peak 4*) and 17.8 min (*peak 5*). The ESI(-) analysis of *peak 1* (B) showed a main  
30 single charged negative ion corresponding to the molecular mass of the deprotonated  
31 HO monomer ( $m/z$  159). The analysis of *peak 2* provided two single charged negative  
32 ions that matched the molecular masses of the deprotonated HX-HO diester ( $m/z$  273)  
33 and of the dimer adduct of HX-HO diester ( $m/z$  547). The analysis of *peak 3* provided  
34 two single charged negative ions that matched the molecular masses of the deprotonated  
35 HO diester ( $m/z$  301) and of the dimer adduct of HO diester ( $m/z$  603). The *peak 4*  
36 showed two single charged negative ions corresponding to the molecular masses of the  
37 deprotonated HO-HX-HO triester ( $m/z$  415) and of the dimer adduct of HO-HX-HO  
38 triester ( $m/z$  830). Finally, the *peak 5* showed two single charged negative ions  
39 corresponding to the molecular masses of the deprotonated HO triester ( $m/z$  443) and of  
40 the dimer adduct of HO triester ( $m/z$  836).

(A)

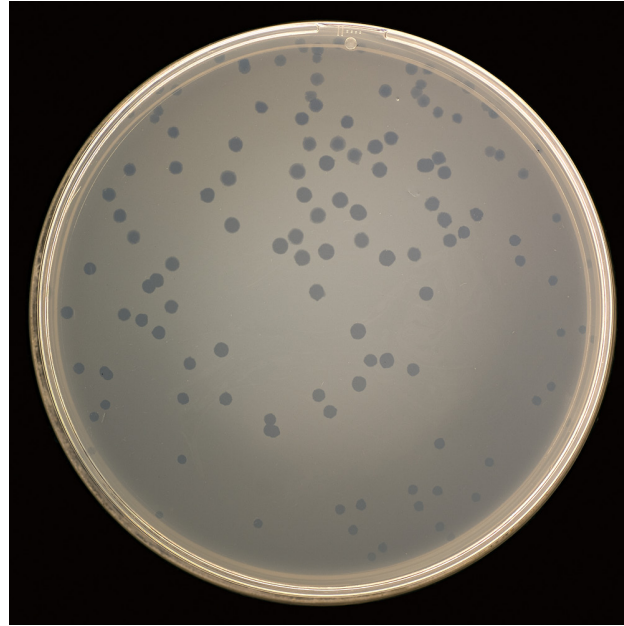

(B)

|       |     |                                                                                                                                                                                                                                                                                                                                    |     |
|-------|-----|------------------------------------------------------------------------------------------------------------------------------------------------------------------------------------------------------------------------------------------------------------------------------------------------------------------------------------|-----|
| GK13  | 1   | MPLR <small>TL</small> LLCGLLLAVCLGQHALA <small>A</small> SRCSE <small>R</small> P <small>R</small> TLL <small>R</small> PA <small>E</small> V <small>S</small> C <small>S</small> YQ <small>S</small> T <small>W</small> L <small>D</small> S                                                                                     | 50  |
|       |     | : .   .   .   : . . .   . : . . .   .   .   : .   . . . .   .   . . . :   .   . . .   .   .                                                                                                                                                                                                                                        |     |
| HD100 | 1   | -- <b>MKLLAGVFGVVMAMLSAQA</b> AKKAS <small>N</small> CEVTGL-VDRMTCPYLEK-LVS                                                                                                                                                                                                                                                        | 46  |
| GK13  | 51  | GLVGQ <small>R</small> KI <small>I</small> YQT <small>P</small> LGTP <small>P</small> PAGGW <small>V</small> VLIYQGSFFPL <small>N</small> D <small>F</small> S <small>Y</small> H <small>S</small> N <small>L</small> P <small>F</small> GGY <small>Y</small>                                                                      | 100 |
|       |     | . . . .   .   .   .   .   .   .   .   .   .   .   .   .   .   .   .   .   .   .   .   .   .   .   .   .   .   .   .   .   .   .   .   .                                                                                                                                                                                            |     |
| HD100 | 47  | GPHL <small>TR</small> HVKYSLPKGK <small>T</small> PKAGW <small>P</small> T <small>V</small> ILYQGS <small>L</small> FPV-EFSR <small>S</small> SLMIAGGY <small>N</small>                                                                                                                                                           | 95  |
| GK13  | 101 | EGKL <small>V</small> Q <small>N</small> LLD <small>H</small> GYAVIAPSAPADLFWQ <small>T</small> NI PGLA <small>Q</small> AYELSTDYDFLG <small>N</small> V <small>L</small>                                                                                                                                                          | 150 |
|       |     | .   .   .   .   .   .   .   .   .   .   .   .   .   .   .   .   .   .   .   .   .   .   .   .   .   .   .   .   .   .   .   .   .   .   .                                                                                                                                                                                          |     |
| HD100 | 96  | EIRLIQ <small>T</small> LLD <small>S</small> G <small>F</small> AVIAPP <small>A</small> IEGVAWMTNIVGI--DYD <small>T</small> SE <small>D</small> FYFVEEL <small>L</small>                                                                                                                                                           | 143 |
| GK13  | 151 | AAIASGH <small>F</small> G <small>P</small> LN <small>A</small> QRQ <small>Y</small> ATGISSGGYNTSRMAV <small>S</small> FP <small>G</small> K <small>F</small> RALAVQSG <small>S</small> Y <small>A</small>                                                                                                                         | 200 |
|       |     | .   . : . :   .   .   .   .   .   .   .   .   .   .   .   .   .   .   .   .   .   .   .   .   .   .   .   .   .   .   .   .   .   .   .   .   .                                                                                                                                                                                    |     |
| HD100 | 144 | VAMG <small>NG</small> EFGK <small>L</small> NMDR <small>L</small> YATGISSG <small>S</small> YHSS <small>R</small> MAV <small>A</small> FPGV <small>F</small> KALAVHSAS <small>Y</small> A                                                                                                                                         | 193 |
| GK13  | 201 | TCSG <small>P</small> LCV <small>P</small> D <small>Q</small> L <small>P</small> ADHP <small>P</small> T <small>L</small> FLHG <small>F</small> VD <small>A</small> VVPW <small>S</small> MDLYD <small>R</small> LLH <small>Q</small> GI <small>E</small> T                                                                        | 250 |
|       |     | .   .   .   .   .   .   .   .   .   .   .   .   .   .   .   .   .   .   .   .   .   .   .   .   .   .   .   .   .   .   .   .   .   .   .                                                                                                                                                                                          |     |
| HD100 | 194 | DCGG <small>P</small> MC <small>F</small> V <small>P</small> AQ <small>V</small> P <small>E</small> NHP <small>P</small> T <small>I</small> FLHG <small>R</small> L <small>D</small> PVVP <small>V</small> RTM <small>Y</small> P <small>Y</small> H <small>E</small> T <small>L</small> KNQ <small>G</small> V <small>E</small> T | 243 |
| GK13  | 251 | ARY <small>T</small> E <small>P</small> LG <small>G</small> H <small>E</small> WF <small>A</small> ASPGK <small>V</small> L <small>A</small> WF <small>N</small> AHP                                                                                                                                                               | 278 |
|       |     | . . . .   . . .   .   . . . :   . : . .   . .   .                                                                                                                                                                                                                                                                                  |     |
| HD100 | 244 | EMFVSP <small>W</small> AR <small>H</small> E <small>W</small> LE <small>E</small> AP <small>E</small> L <small>I</small> T <small>N</small> WF <small>I</small> N <small>H</small> K                                                                                                                                              | 271 |

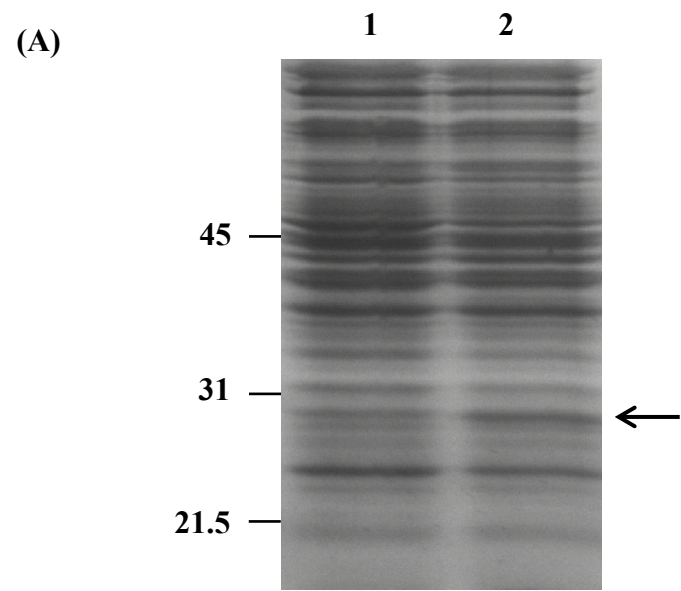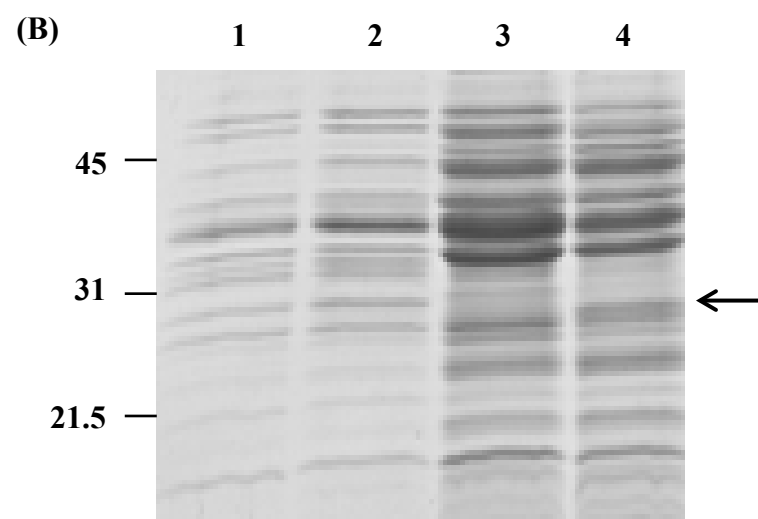

(A)

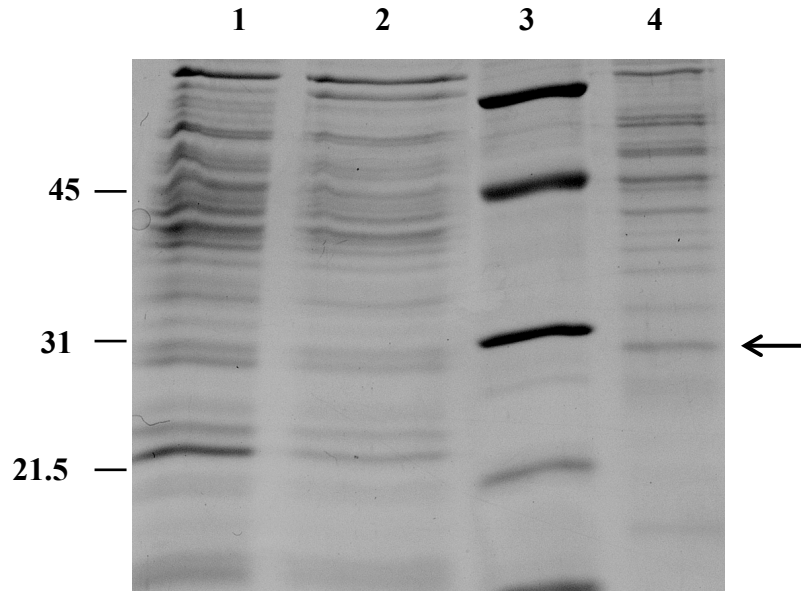

(B)

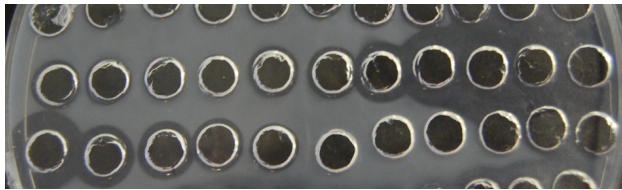

(C)

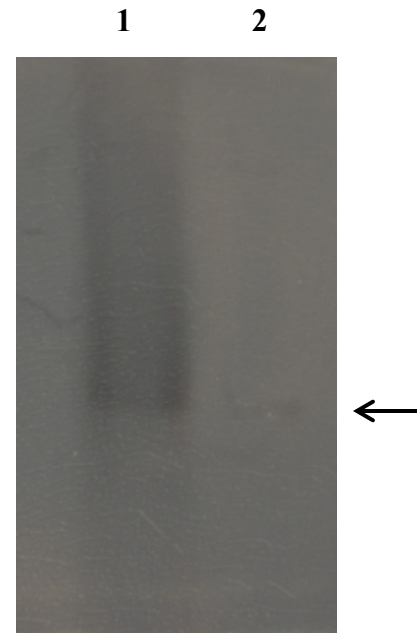

(A)

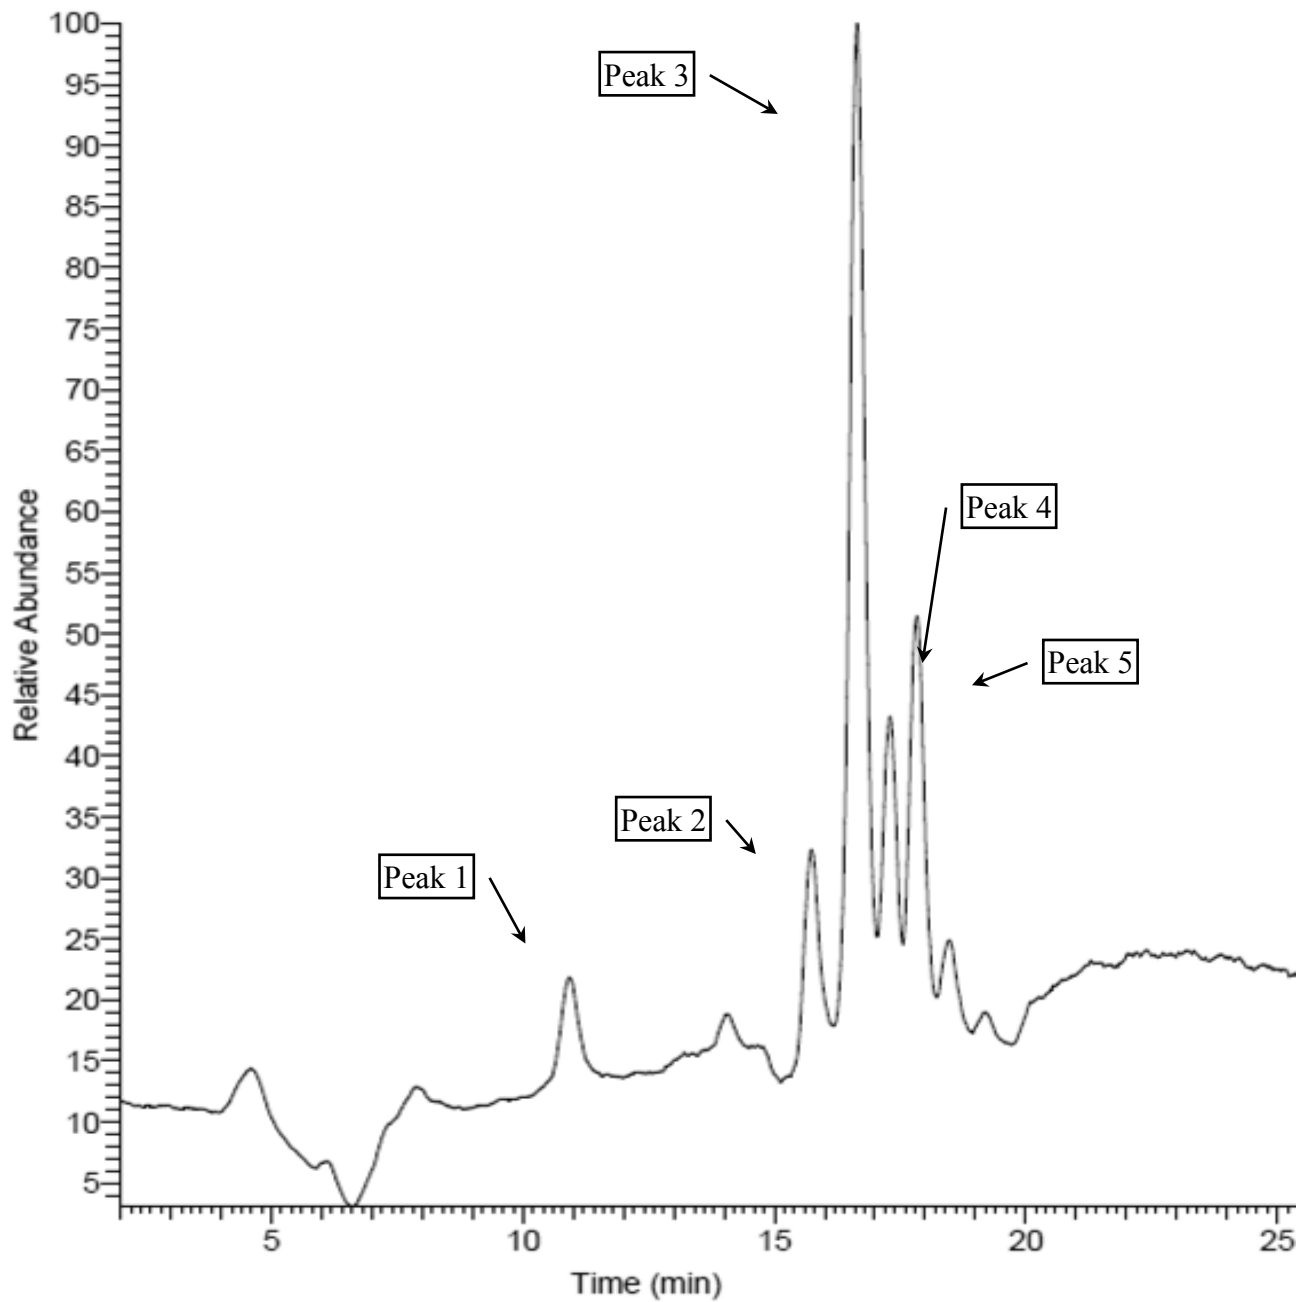

(B)

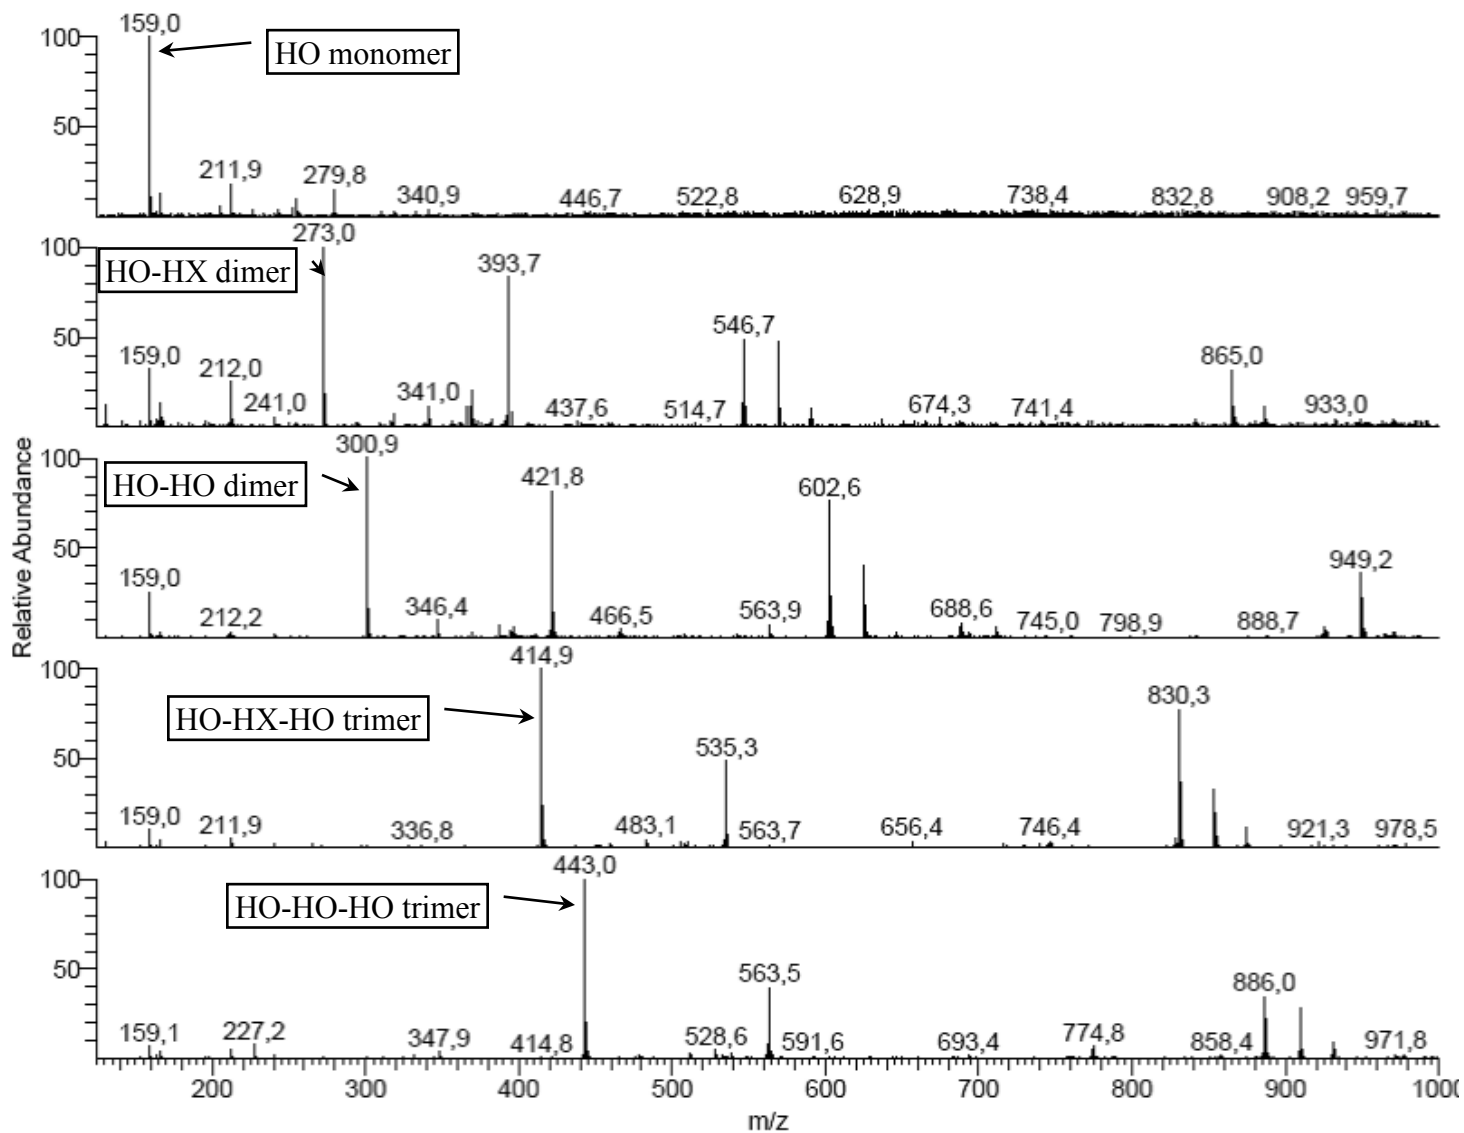

Supplement: AEM.01099-12_zam999103576so1.pdf [file AEM.01099-12_zam999103576so1.pdf]
